# Supplementary material for: Transcriptional integration of paternal and maternal factors in the Arabidopsis zygote
Source: PubMed Central journal article supplement — Genes Dev. 2017 Mar 15;31(6):617–27. doi: 10.1101/gad.292409.116 (PMC5393056; doi:10.1101/gad.292409.116), 2017-03-15

**A**

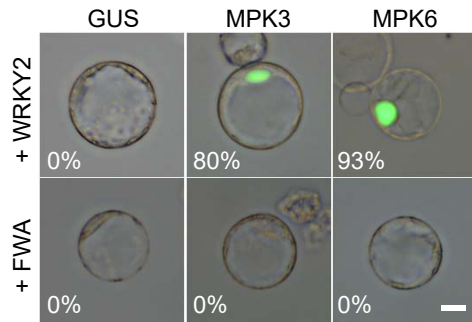

**B**

MAGFDENVAVMGEWVPRSPSPGTLFSSAIGEEKSSKRVLREL<sup>S</sup>LNHGQVIG  
 LEEDTSSNHNKSSQSNVFRGGLSERIAARAGFNAPRLNTENIRTNDFSID  
 SNLR<sup>S</sup>PCLTIS<sup>S</sup>PGL<sup>S</sup>PATLLES<sup>S</sup>PVFLSNPLAQP<sup>S</sup>PTTGKFPFLPGVNGNAL  
 SSEKAKDEFFDDIGASF<sup>S</sup>FPVSRSSSSFFQGTTEMMSVDYGNYNRRSSSHQ  
 SAEVKPGSENI<sup>S</sup>ESSNLYGIETDNQNGQNKTS<sup>S</sup>VDV<sup>S</sup>TTN<sup>S</sup>IS<sup>S</sup>LET<sup>S</sup>VDHQEEEEEQ  
 RRGDSMAGGAPAE<sup>S</sup>DGYNWRKY<sup>S</sup>GQKLVK<sup>S</sup>GSEY<sup>S</sup>PRSY<sup>S</sup>YKCTN<sup>S</sup>PN<sup>S</sup>CQV<sup>S</sup>KKK<sup>S</sup>VERS  
 REGHIT<sup>S</sup>ET<sup>S</sup>IYKGAHNHLKPPPNRRSGMQVDGTEQVEQQQQQRDSAATWVSCN  
 NTQQGGSNENNVEEGSTRFEYGNQSGSIQAQTGGQYESGDPVVVVDASSTF  
 SNDEDEDDRGTGHSVSLGYDGGGGGGGGEGDESESKRRKLEAFAAEMSGSTR  
 AIREPRVVVQTTSDVDILDDGYRWRKY<sup>S</sup>GQKVVKGNPN<sup>S</sup>PRSY<sup>S</sup>YKCTAPGCTVR  
 KHVERASHDLKSVITTYEGKHNDVPAARNSSHGGGGDSNGNSGGSAAVSH  
 HYHNGHHSEPPRGRFDRQVTTNNQSPFSRPF<sup>S</sup>FQPHLGP<sup>S</sup>PGS<sup>S</sup>FGLGQTGL  
 VNLSMPGLAYGQKMPGLPHPYMTQPVGMSEAMMQ<sup>S</sup>RGMEPK<sup>S</sup>VEPVSDSGQSV  
 YNQIMSRLPQI\*

**C**

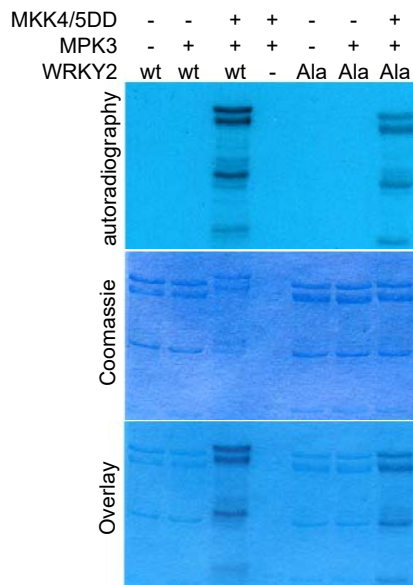

**D**

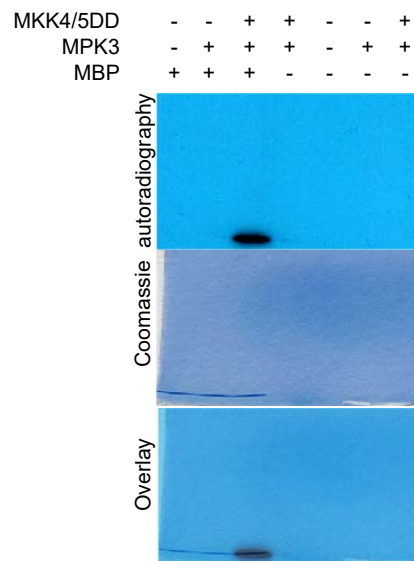

Supplement: supp_31.6.617_Supplemental_Fig_S1.pdf [file supp_31.6.617_Supplemental_Fig_S1.pdf]
