# Supplementary material for: Transcriptional integration of paternal and maternal factors in the Arabidopsis zygote
Source: PubMed Central journal article supplement — Genes Dev. 2017 Mar 15;31(6):617–27. doi: 10.1101/gad.292409.116 (PMC5393056; doi:10.1101/gad.292409.116), 2017-03-15
Supplement: supp_31.6.617_Supplemental_Table_S1.pdf [file supp_31.6.617_Supplemental_Table_S1.pdf]

**Supplemental Table S1. Defects of zygotic division.**

| Figure  | Genotype                          | apical <sup>1</sup><br>( $\mu\text{m}$ ) | SD  | group | basal <sup>2</sup><br>( $\mu\text{m}$ ) | SD   | group | apical<br>/basal <sup>3</sup> | SD  | group | total <sup>4</sup><br>( $\mu\text{m}$ ) | SD   | group | n   |
|---------|-----------------------------------|------------------------------------------|-----|-------|-----------------------------------------|------|-------|-------------------------------|-----|-------|-----------------------------------------|------|-------|-----|
| Fig. 1B | wild type                         | 12.5                                     | 1.6 | a     | 57.1                                    | 7.8  | a,b   | 0.22                          | 0.0 | a     | 69.6                                    | 8.4  | a,b   | 80  |
|         | <i>ssp-2</i>                      | 15.0                                     | 2.6 | c, d  | 46.5                                    | 8.3  | c     | 0.34                          | 0.1 | b     | 61.5                                    | 8.3  | c     | 129 |
|         | <i>wrky2-1</i>                    | 18.3                                     | 4.5 | e     | 38.6                                    | 6.0  | d     | 0.49                          | 0.2 | c     | 56.9                                    | 5.9  | d     | 80  |
|         | <i>wrky2-1 ssp-2</i>              | 17.3                                     | 4.0 | e     | 35.2                                    | 7.1  | e     | 0.52                          | 0.2 | c     | 52.5                                    | 6.9  | e     | 153 |
|         | <i>ssp-2 WOX8</i>                 | 13.5                                     | 1.8 | a,b   | 56.0                                    | 6.6  | a,b   | 0.24                          | 0.0 | a     | 69.4                                    | 6.8  | a,b   | 113 |
|         | <i>ssp-2 WRKY2</i>                | 14.2                                     | 2.3 | b, c  | 44.8                                    | 7.4  | c     | 0.33                          | 0.1 | b     | 58.9                                    | 7.3  | c,d   | 124 |
|         | <i>ssp-2 WRKY2(Asp)</i>           | 13.5                                     | 2.1 | a, b  | 54.2                                    | 6.5  | b     | 0.25                          | 0.1 | a     | 67.7                                    | 6.8  | b     | 158 |
|         | <i>ssp-2 WRKY2(Ala)</i>           | 15.4                                     | 2.6 | d     | 46.4                                    | 7.3  | c     | 0.35                          | 0.1 | b     | 61.8                                    | 6.9  | c     | 82  |
|         | <i>wrky2-1 WRKY2(Asp)</i>         | 12.9                                     | 2.4 | e     | 58.4                                    | 7.3  | a     | 0.22                          | 0.0 | a     | 71.3                                    | 8.0  | a     | 107 |
|         |                                   |                                          |     |       |                                         |      |       |                               |     |       |                                         |      |       |     |
| Fig. 4B | wild type                         | 12.5                                     | 1.6 | a     | 57.1                                    | 7.8  | a     | 0.22                          | 0.0 | a     | 69.6                                    | 8.4  | a     | 80  |
|         | <i>hdg11/12</i>                   | 13.3                                     | 2.0 | a     | 46.6                                    | 8.2  | c     | 0.29                          | 0.1 | b     | 59.9                                    | 8.6  | c     | 161 |
|         | <i>hdg11/12 HDG11</i>             | 12.3                                     | 1.8 | a     | 54.9                                    | 7.6  | a,b   | 0.23                          | 0.0 | a     | 67.3                                    | 8.1  | a,b   | 82  |
|         | <i>hdg11/12 WOX8</i>              | 12.1                                     | 1.9 | a     | 53.1                                    | 7.3  | b     | 0.23                          | 0.0 | a     | 65.2                                    | 8.2  | b     | 90  |
|         | <i>wrky2-1</i>                    | 18.3                                     | 4.5 | b     | 38.6                                    | 6.0  | d     | 0.49                          | 0.2 | c     | 56.9                                    | 5.9  | c     | 80  |
|         | <i>wrky2-1 hdg11/12</i>           | 17.9                                     | 3.6 | b     | 28.7                                    | 7.0  | e     | 0.67                          | 0.2 | d     | 46.6                                    | 7.1  | d     | 81  |
|         | <i>ssp-2 wrky2-1 hdg11/12</i>     | 18.3                                     | 3.7 | b     | 28.5                                    | 7.0  | e     | 0.69                          | 0.3 | d     | 46.7                                    | 7.0  | d     | 84  |
|         | <i>hdg11/12 pHTR10: HDG11-YFP</i> | 12.2                                     | 2.3 | a     | 57.6                                    | 7.8  | a     | 0.21                          | 0.0 | a     | 69.8                                    | 8.8  | a     | 89  |
|         |                                   |                                          |     |       |                                         |      |       |                               |     |       |                                         |      |       |     |
| Fig. 5A | wild type                         | 12.4                                     | 1.7 | a     | 65.9                                    | 7.8  | a     | 0.19                          | 0.0 | a     | 78.3                                    | 8.3  | a     | 95  |
|         | <i>hdg11/12</i>                   | 13.2                                     | 2.3 | b     | 54.9                                    | 12.0 | b     | 0.25                          | 0.1 | b     | 68.1                                    | 12.8 | b     | 100 |
|         | <i>hdg11/12 x wild type</i>       | 13.3                                     | 2.3 | b     | 53.2                                    | 10.9 | b     | 0.26                          | 0.1 | b     | 66.5                                    | 10.8 | b     | 80  |
|         | <i>wild type x hdg11/12</i>       | 12.1                                     | 1.5 | a     | 62.6                                    | 9.1  | a     | 0.20                          | 0.0 | a     | 74.7                                    | 9.4  | a     | 80  |
|         | <i>hdg11-1</i>                    | 12.6                                     | 2.0 | a,b   | 62.1                                    | 7.6  | a     | 0.21                          | 0.0 | a     | 74.7                                    | 8.2  | a     | 101 |
|         | <i>hdg12-2</i>                    | 12.3                                     | 1.8 | a     | 63.3                                    | 8.8  | a     | 0.20                          | 0.0 | a     | 75.6                                    | 9.0  | a     | 80  |

<sup>1, 2, 3, 4</sup> Values are shown as means. The groups indicate the significantly associated categories ( $P < 0.05$  by the Tukey-Kramer test). *hdg11/12*, *hdg11-1 hdg12-2* double mutant; *WOX8*, *pEASE:WOX8-YFP*; *WRKY2*, *pWRKY2:WRKY2-YFP*; *WRKY2(Ala)*, *pWRKY2:WRKY2(Ala)-YFP*; *WRKY2(Asp)*, *pWRKY2:WRKY2(Asp)-YFP*; *HDG11*, *pHDG11:HDG11-YFP*. The cross is denoted as female x male. The data of Figures 1B and 4B were obtained in one experiment, thus the wild-type values are identical.
