# Supplementary material for: Transcriptional integration of paternal and maternal factors in the Arabidopsis zygote
Source: PubMed Central journal article supplement — Genes Dev. 2017 Mar 15;31(6):617–27. doi: 10.1101/gad.292409.116 (PMC5393056; doi:10.1101/gad.292409.116), 2017-03-15
Supplement: supp_31.6.617_Supplemental_Table_S2.pdf [file supp_31.6.617_Supplemental_Table_S2.pdf]

**Supplemental Table S2.** List of mutants and transgenic plants in this study.

| Mutant                       | Mutation site       | Allele strength                |
|------------------------------|---------------------|--------------------------------|
| <i>wrky2-1</i>               | T-DNA in 5'UTR      | RNA null (Ueda et al., 2011)   |
| <i>hdg11-1</i>               | T-DNA in 9th exon   | RNA null (Khosla et al., 2014) |
| <i>hdg12-2</i>               | T-DNA in 3rd exon   | Not analyzed                   |
| <i>ssp-2</i>                 | T-DNA in 2nd intron | RNA null (Bayer et al., 2009)  |
| Construct                    | Clone code          | Plant resistance               |
| <i>pWRKY2:WRKY2-YFP</i>      | MU789               | Basta                          |
| <i>pWRKY2:WRKY2(Ala)-YFP</i> | MU887               | Basta                          |
| <i>pWRKY2:WRKY2(Asp)-YFP</i> | MU889               | Basta                          |
| <i>pHDG11:YFP</i>            | MU743               | Basta                          |
| <i>pHDG12:YFP</i>            | MU744               | Basta                          |
| <i>pHDG11:HDG11-YFP</i>      | MU817               | Hygromycin                     |
| <i>pHTR10:HDG11-YFP</i>      | MU1058              | Hygromycin                     |

All vectors confer kanamycin resistance in bacteria.
