# Supplementary figures and images for: Transcriptional integration of paternal and maternal factors in the Arabidopsis zygote
Source: PubMed Central journal article supplement — Genes Dev. 2017 Mar 15;31(6):617–27. doi: 10.1101/gad.292409.116 (PMC5393056; doi:10.1101/gad.292409.116), 2017-03-15

## Ser18

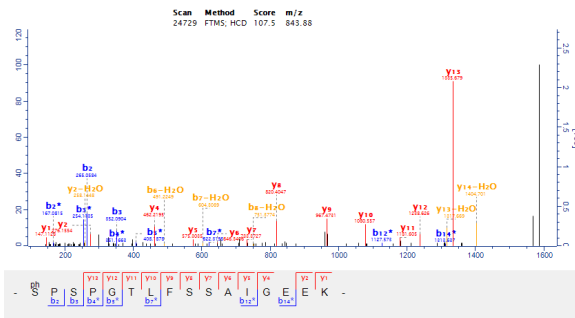

## Ser20

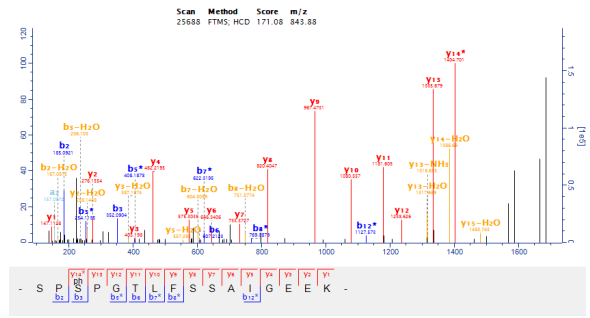

## Ser44

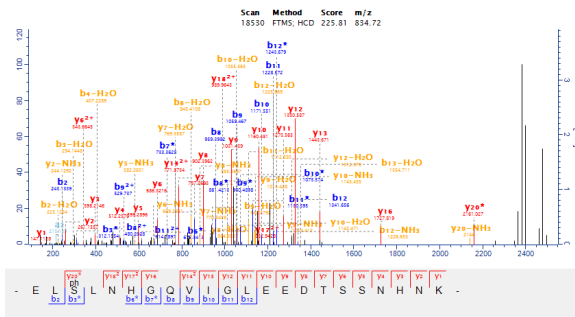

## Ser115 / Ser116

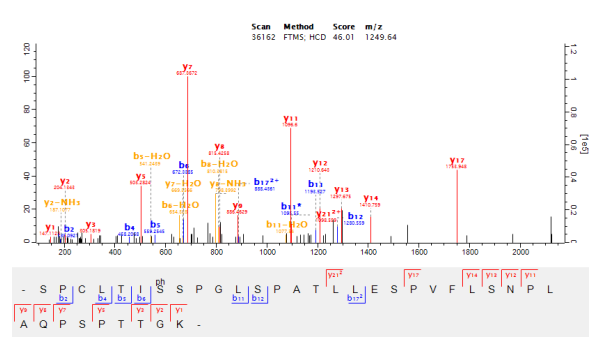

## Ser120

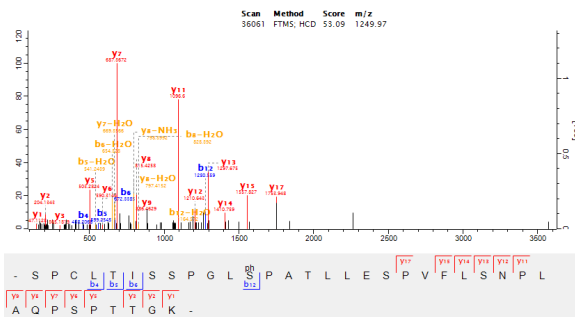

## Ser247

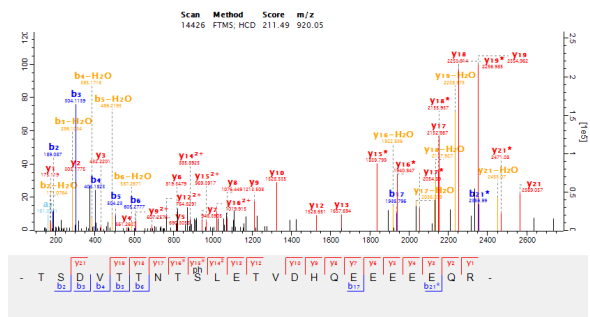

## Thr243 / Thr250

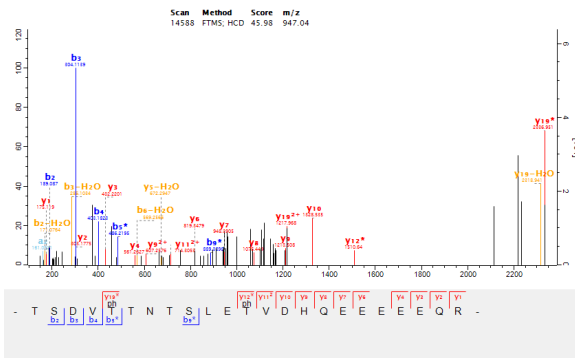

## Thr123

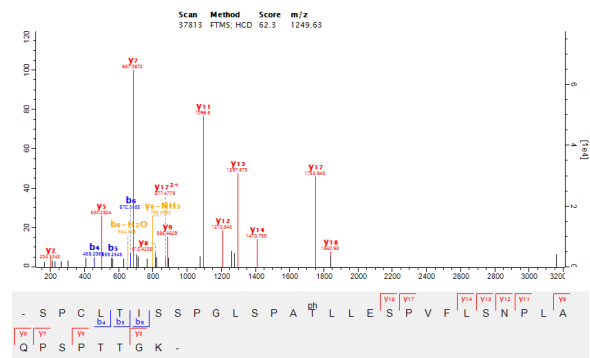

Supplement: supp_31.6.617_Supplemental_Fig_S2.pdf [file supp_31.6.617_Supplemental_Fig_S2.pdf]

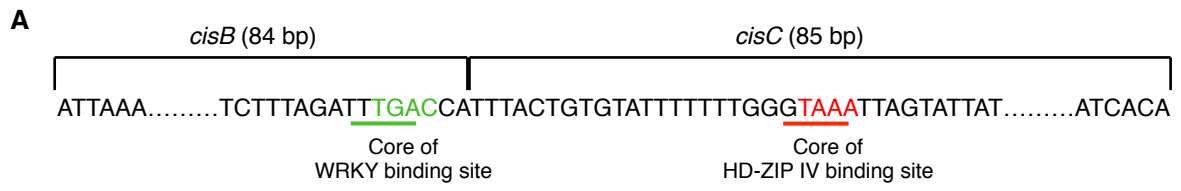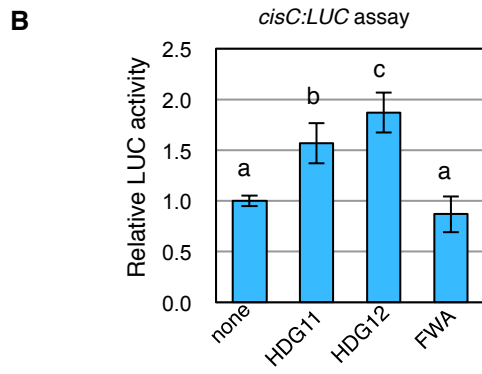

Supplement: supp_31.6.617_Supplemental_Fig_S3.pdf [file supp_31.6.617_Supplemental_Fig_S3.pdf]

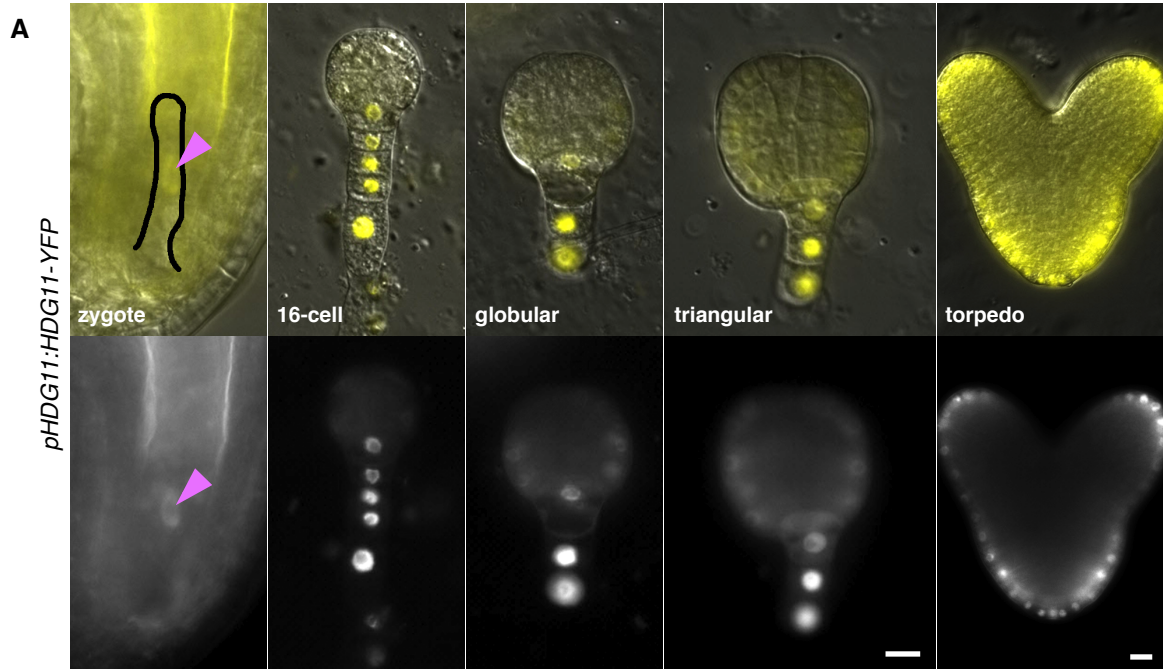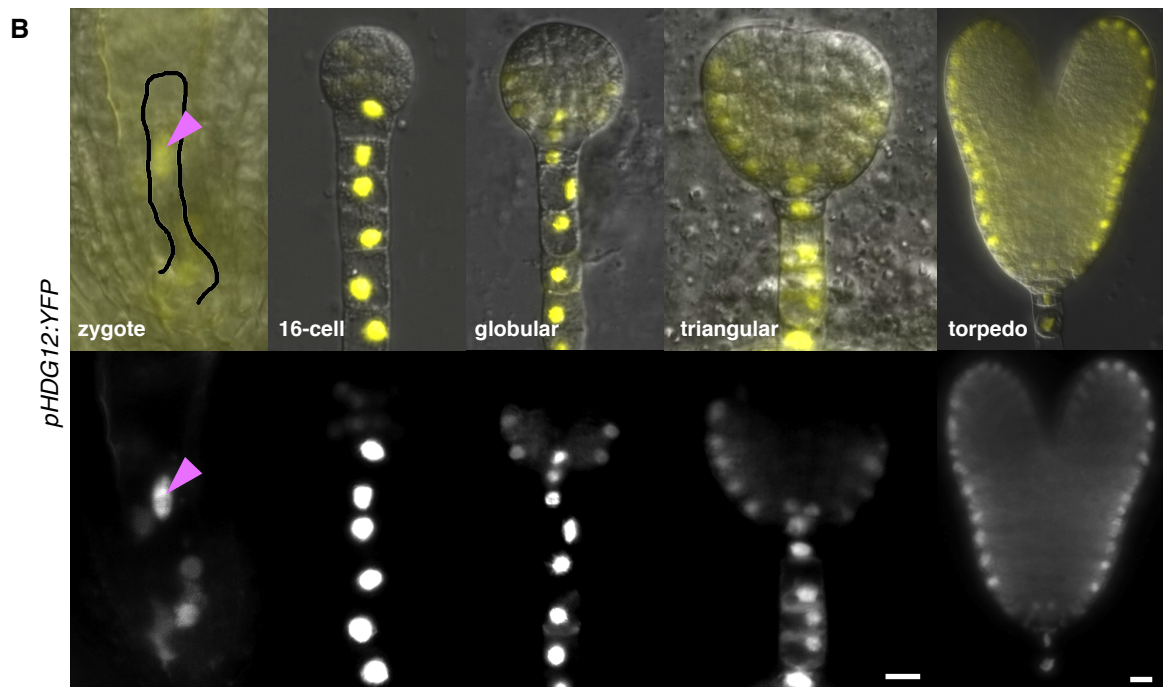

Supplement: supp_31.6.617_Supplemental_Fig_S4.pdf [file supp_31.6.617_Supplemental_Fig_S4.pdf]

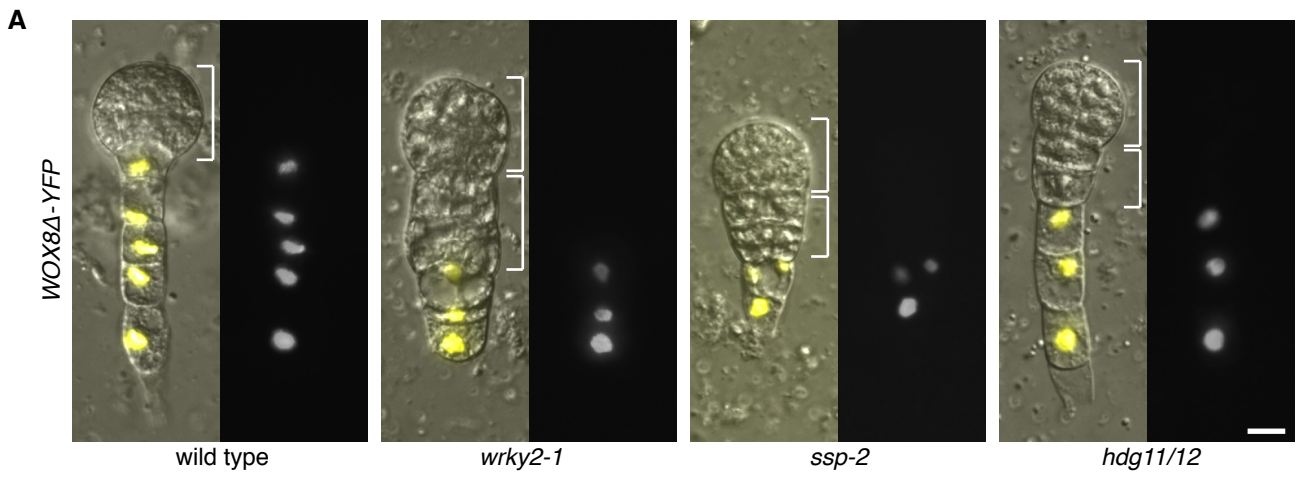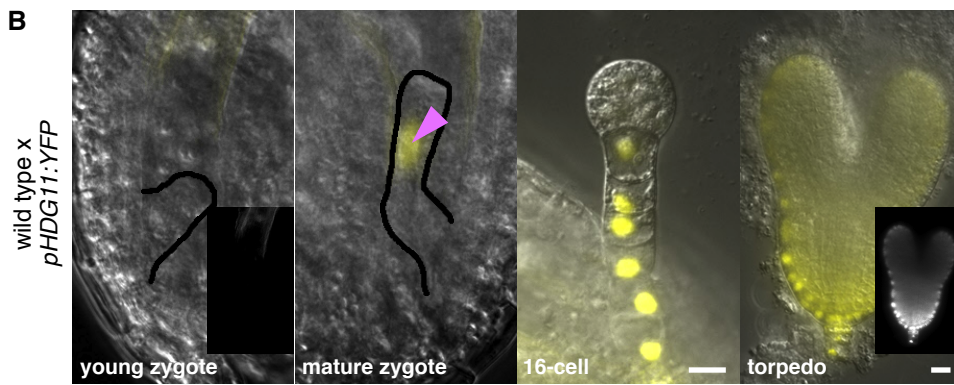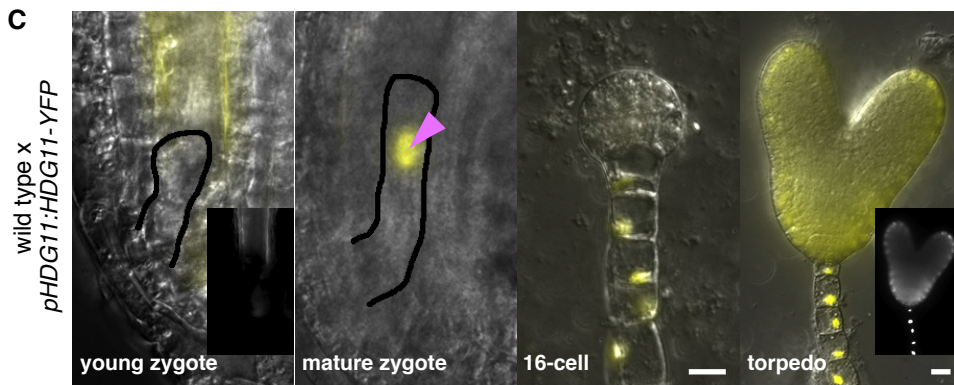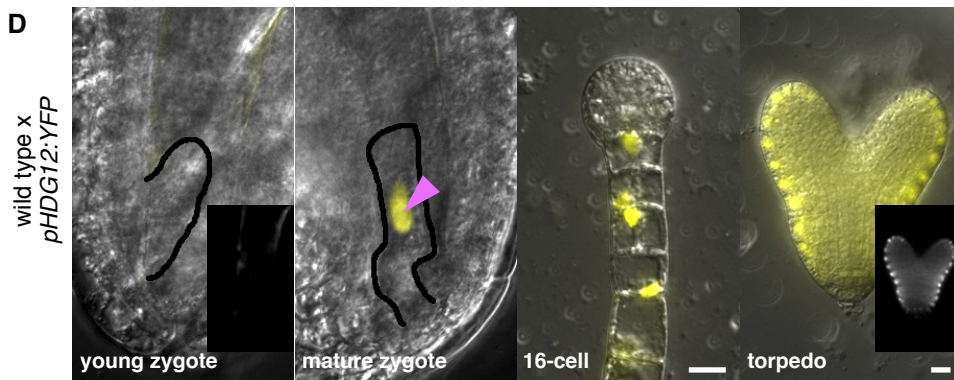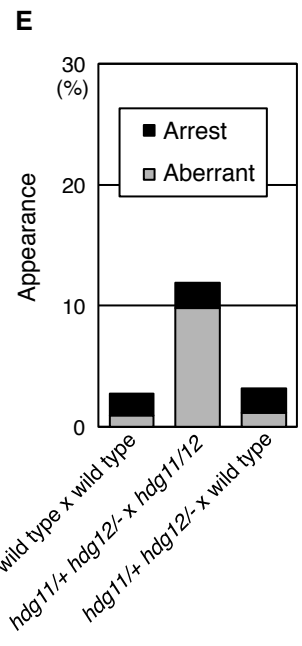

Supplement: supp_31.6.617_Supplemental_Fig_S5.pdf [file supp_31.6.617_Supplemental_Fig_S5.pdf]
